# Supplementary material for: Fabrication of gold and silver hierarchically micro/nanostructured arrays by localized electrocrystallization for application as SERS substrates
Source: Royal Society of Chemistry journal article supplement (doi:10.1039/c5tc00790a), 2015-01-01
Supplement: c5tc00790a1.pdf [file c5tc00790a1.pdf]

## Electronic Supplementary Information

### **Fabrication of gold and silver hierarchical micro/nanostructure arrays by localized electrocrystallization for application as SERS substrates**

Jingjing Wang,<sup>a</sup> Guotao Duan,<sup>a\*</sup> Guangqiang Liu,<sup>a</sup> Yue Li,<sup>a</sup> Lei Xu,<sup>b</sup> and Weiping  
Cai<sup>a\*</sup>

<sup>a</sup>Key Lab of Materials Physics, Anhui Key Lab of Nanomaterials and  
Nanotechnology, Institute of Solid State Physics, Chinese Academy of Sciences,  
Hefei, 230031, P. R. China

<sup>b</sup>East China Research Institute of Electronic Engineering, Hefei, 230088, P. R. China

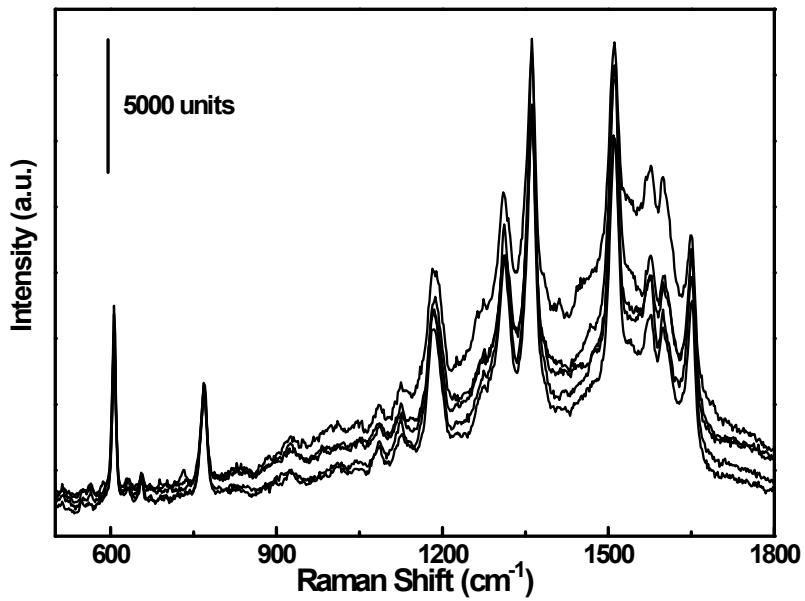

**Fig. S1** SERS spectra of R6G molecules absorbed Au hierarchically micro/nanostructured arrays after surface coating of ~60 nm Au film. The Raman test conditions are respectively, laser wavelength: 633 nm, laser power: 0.85mW, integration time: 10 s. These spectra were obtained from five different points randomly chosen on sample surface, and the measurement error is 12%.

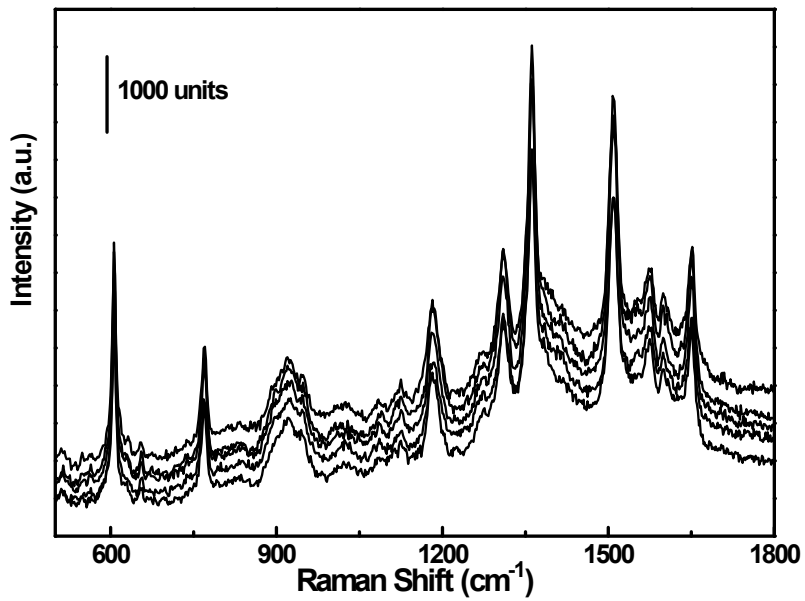

**Fig. S2** SERS spectra of R6G molecules adsorbed on Ag hierarchically micro/nanostructured arrays after surface coating of ~60 nm Au film. The Raman test conditions are respectively, laser wavelength: 633 nm, laser power: 0.85mW, integration time: 10 s. These spectra were obtained from five different points randomly chosen on sample surface, and the measurement error is 10%.
